# Supplementary material
Source: PubMed Central journal article supplement (PMC10416780)
Supplement: NIHMS1900331-supplement-Supplement.pdf [file NIHMS1900331-supplement-Supplement.pdf]

## A. Implementation of algorithms in R

R code implementing causal isotonic calibration with user-supplied (cross-fitted) nuisance estimates and predictions is provided in the Github package

## B. Algorithm for causal isotonic calibration with cross-fitted nuisance estimates

---

**Algorithm 4** Causal isotonic calibration (cross-fitted nuisances)

---

**Require:** predictor  $\tau$ , dataset  $\mathcal{D}_n$ , # of cross-fitting splits  $k$

- 1: partition  $\mathcal{D}_n$  into datasets  $\mathcal{T}^{(1)}, \mathcal{T}^{(2)}, \dots, \mathcal{T}^{(k)}$ ;
- 2: **for**  $s = 1, 2, \dots, k$  **do**
- 3:   let  $j(i) = s$  for each  $i \in \mathcal{T}^{(s)}$ ;
- 4:   get estimate  $\chi_{n,s}$  of  $\chi_0$  from  $\mathcal{D}_n \setminus \mathcal{T}^{(s)}$ ;
- 5: **end for**
- 6: perform isotonic regression using pooled out-of-fold estimates to find

$$\theta_n^* = \operatorname{argmin}_{\theta \in \mathcal{F}_{iso}} \frac{1}{n} \sum_{i=1}^n [\chi_{n,j(i)}(O_i) - (\theta \circ \tau)(W_i)]^2;$$

- 7: set  $\tau_n^* := \theta_n^* \circ \tau$ ;

**Ensure:**  $\tau_n^*$

---

## C. Technical proofs

Unless stated otherwise, the function  $\tau_n^*$  denotes a calibrated predictor obtained using Algorithm 1 with a predictor  $\tau$ , training dataset  $\mathcal{E}_m$ , and calibration dataset  $\mathcal{C}_\ell = \mathcal{D}_n \setminus \mathcal{E}_m$  as described in Section 4.

### C.1. Notation & definitions

Let  $\mathcal{T} := \{\tau(w) : w \in \mathcal{W}\}$  denote the range of the predictor  $\tau$ , which is a bounded subset of  $\mathbb{R}$  by Condition 4.4. We redefine  $\mathcal{F}_{iso} \subset \{\theta : \mathcal{T} \rightarrow \mathbb{R}; \theta \text{ is monotone nondecreasing}\}$  to denote the family of nondecreasing functions on  $\mathcal{T}$  uniformly bounded by

$$B := \sup_{m \in \mathbb{N}} \sup_{\mathcal{E}_m} \sup_{o \in \mathcal{O}} [|\chi_0(o)| + |\chi_m(o)|],$$

where the second supremum is over all possible realizations of the training dataset  $\mathcal{E}_m$ . We necessarily have that  $B$  is nonrandom and finite by Lemma C.2. Redefining  $\mathcal{F}_{iso}$  to be bounded allows us to directly apply certain maximal inequalities for empirical processes indexed by  $\mathcal{F}_{iso}$ . Since the isotonic regression estimator is obtained by locally averaging the pseudo-outcome  $\chi_m$  (Barlow & Brunk, 1972), the unconstrained isotonic regression solution satisfies this bound and falls in the interior of this class almost surely. Moreover,  $\mathcal{F}_{iso}$  is a convex subset of the space of monotone nondecreasing functions. Let  $\mathcal{F}_{TV} \subset \{\theta : \mathbb{R} \rightarrow \mathbb{R}; \theta \text{ is of bounded variation}\}$  denote the space of functions with total variation uniformly bounded by three times the total variation of the function  $\theta_0$  where  $\theta_0$  is as in condition 4.5. Additionally, let  $\mathcal{F}_{\tau, iso} := \{\theta \circ \tau : \mathcal{W} \rightarrow \mathbb{R}; \theta \in \mathcal{F}_{iso}\}$  be the family of functions obtained by composing nondecreasing functions in  $\mathcal{F}_{iso}$  with  $\tau$ , and let  $\mathcal{F}_{\tau, TV} := \{\theta \circ \tau : \mathcal{W} \rightarrow \mathbb{R}; \theta \in \mathcal{F}_{TV}\}$  be the family of functions obtained by composing functions in  $\mathcal{F}_{TV}$  with  $\tau$ . Let  $\mathcal{F}_{Lip, m} := \{o \mapsto [\tau_2(w) - \tau_1(w)][\chi_m(o) - \tau_2(w)] : \mathcal{O} \rightarrow \mathbb{R}; \tau_2 \in \mathcal{F}_{\tau, TV}, \tau_1 \in \mathcal{F}_{\tau, iso}\}$ , where  $\chi_m$  is the estimated pseudo-outcome function. Finally, for a function class  $\mathcal{F}$ , let  $N(\epsilon, \mathcal{F}, L_2(Q))$  denote the  $\epsilon$ -covering number (van der Vaart & Wellner, 1996) of  $\mathcal{F}$  and define the uniform entropy integral of  $\mathcal{F}$  by

$$\mathcal{J}(\delta, \mathcal{F}) := \int_0^\delta \sup_Q \sqrt{\log N(\epsilon, \mathcal{F}, L_2(Q))} d\epsilon,$$

where the supremum is taken over all discrete probability distributions  $Q$ . In contrast to the definition provided in van der Vaart & Wellner (1996), we do not define the uniform entropy integral relative to an envelope function for the function class  $\mathcal{F}$ . We can do this since all function classes we consider are uniformly bounded. Thus, any uniformly bounded envelope function will only change the uniform entropy integral as defined in van der Vaart & Wellner (1996) by a constant.

In the results below, we will use the following empirical process notation: for a  $P$ -measurable function  $f$ , we denote  $\int f(o)dP(o)$  by  $Pf$ , and so, letting  $P_\ell$  denote the empirical distribution of  $\mathcal{C}_\ell$ ,  $P_\ell f$  equals  $\frac{1}{\ell} \sum_{i \in \mathcal{I}_\ell} f(O_i)$  with  $\mathcal{I}_\ell$  indexing observations of  $\mathcal{C}_\ell \subset \mathcal{D}_n$ . We also let  $\|f\|_P^2 := Pf^2$ ; to simplify notation, we omit the dependency in  $P$  and use  $\|f\|^2$  instead of  $\|f\|_P^2$ . Finally, for two quantities  $x$  and  $y$ , we use the expression  $x \lesssim y$  to mean that  $x$  is upper bounded by  $y$  times a universal constant that may only depend on global constants that appear in conditions 4.1-4.5

## C.2. Technical lemmas

The following lemma is a key component of our proof of Theorem 4.6.

**Lemma C.1.** *For a calibrated predictor  $\tau_n^*$  obtained using Algorithm 1, and any real-valued function  $r$ , we have that*

$$\sum_{i \in \mathcal{I}_\ell} [r \circ \tau_n^*(W_i)] [\tau_n^*(W_i) - \chi_m(O_i)] = 0. \quad (5)$$

*Proof.* Note that  $\tau_n^*(w)$  can be expressed pointwise for any  $w \in \mathcal{W}$  as  $\theta_n^* \circ \tau(w) = a_0 + \sum_{j=1}^J a_j 1(\tau(w) \geq u_j)$  for a piecewise constant function  $\theta_n^*$  determined by coefficients  $\{a_j\}_{j=0}^J$  and jump points  $\{u_j\}_{j=1}^J$  (Barlow & Brunk, 1972). By monotonicity, we necessarily have  $a_0 \in \mathbb{R}$  and  $\{a_j\}_{j=1}^J$  are positive coefficients.

Let  $R_n(\theta) := \sum_{i \in \mathcal{I}_\ell} [\theta \circ \tau(W_i) - \chi_m(O_i)]^2$  denote the least-squares risk used in the isotonic regression step. Fix an arbitrary jump point  $\bar{u}_j$ , and let  $\xi_n : \mathbb{R}^2 \rightarrow \mathbb{R}$  denote the function  $\xi_n(\varepsilon, h) := \theta_n^*(h) + \varepsilon 1(h \geq \bar{u}_j)$ . Note that  $\delta > 0$  can be chosen to be sufficiently small that, for all  $|\varepsilon| \leq \delta$ ,  $h \mapsto \xi_n(\varepsilon, h)$  is nondecreasing — for instance,  $\delta = \min\{a_j\}_{j=1}^J$  suffices. Thus, for sufficiently small  $\delta > 0$ ,  $h \mapsto \xi_n(\varepsilon, h)$  lies in the space of monotone nondecreasing function for all  $|\varepsilon| \leq \delta$ . In a slight abuse of notation, we let  $R_n(\xi_n(\varepsilon)) := \sum_{i \in \mathcal{I}_\ell} [\xi_n(\varepsilon, \tau(W_i)) - \chi_m(O_i)]^2$  and  $R_n(\xi_n(-\varepsilon)) := \sum_{i \in \mathcal{I}_\ell} [\xi_n(-\varepsilon, \tau(W_i)) - \chi_m(O_i)]^2$ .

Now, because  $\theta_n^*$  minimizes  $\theta \mapsto R_n(\theta)$  over the space of monotone nondecreasing functions, for all  $\varepsilon \geq 0$ , it holds that both  $R_n(\xi_n(\varepsilon)) - R_n(\tau_n^*) \geq 0$  and  $R_n(\xi_n(-\varepsilon)) - R_n(\tau_n^*) \geq 0$ . Moreover, when  $\varepsilon = 0$ ,  $R_n(\xi_n(0)) - R_n(\tau_n^*) = 0$ . Therefore, if  $\varepsilon$  is sufficiently close to 0, the derivative with respect to  $\varepsilon$  of  $R_n(\xi_n(\varepsilon)) - R_n(\tau_n^*)$  must be non-negative, and  $R_n(\xi_n(-\varepsilon)) - R_n(\tau_n^*)$  must be non-positive. Hence, it must be true that

$$\left. \frac{d}{d\varepsilon} [R_n(\xi_n(\varepsilon)) - R_n(\theta_n^*)] \right|_{\varepsilon=0} \geq 0 \quad \text{and} \quad \left. \frac{d}{d\varepsilon} [R_n(\xi_n(-\varepsilon)) - R_n(\theta_n^*)] \right|_{\varepsilon=0} \leq 0.$$

This, in turn, implies that

$$2 \sum_{i \in \mathcal{I}_\ell} 1(\tau(W_i) \geq \bar{u}_j) [\tau_n^*(W_i) - \chi_m(O_i)] \geq 0 \quad \text{and} \quad 2 \sum_{i \in \mathcal{I}_\ell} 1(\tau(W_i) \geq \bar{u}_j) [\tau_n^*(W_i) - \chi_m(O_i)] \leq 0,$$

and so, it follows that  $\sum_{i \in \mathcal{I}_\ell} 1(\tau(W_i) \geq \bar{u}_j) [\tau_n^*(W_i) - \chi_m(O_i)] = 0$ . Because the jump point  $\bar{u}_j$  was arbitrary, we have that for all functions of the form  $s(w) = b_0 + \sum_{j=1}^J b_j 1(\tau(w) \geq u_j)$  with coefficients  $\{b_j\}_{j=0}^J$ , we can show that

$$\sum_{i \in \mathcal{I}_\ell} s(W_i) [\tau_n^*(W_i) - \chi_m(O_i)] = 0$$

by taking linear combinations of  $1(\tau(w) \geq u_j)$  and noting that the score equations are linear in  $s$ . The main result of this lemma follows from the fact that, since both  $\tau_n^*$  and  $r \circ \tau_n^*$  can be expressed in this form, for any real-valued function  $r$ , we have that

$$\sum_{i \in \mathcal{I}_\ell} r \circ \tau_n^*(W_i) [\tau_n^*(W_i) - \chi_m(O_i)] = 0.$$

□

**Lemma C.2.** *Conditions 4.1, 4.2 and 4.4 imply that the function classes  $\mathcal{F}_{iso}$ ,  $\mathcal{F}_{\tau,TV}$ ,  $\mathcal{F}_{\tau,iso}$  and  $\mathcal{F}_{Lip,m}$  are bounded.*

*Proof.* By Conditions 4.1, 4.2 and 4.4, we know that  $\chi_m(o)$  is bounded uniformly over all observations  $o \in \mathcal{O}$  and realizations of  $\mathcal{E}_m$ , that is, there exists a finite fixed constant  $B$  such that  $\text{ess sup}_{m \in \mathbb{N}, o \in \mathcal{O}} \chi_m(o) \leq B/2$ . Hence, as defined in the previous section,  $\mathcal{F}_{iso}$  is uniformly bounded. Moreover, because  $\mathcal{F}_{iso}$  is bounded, it directly implies that

$\mathcal{F}_{\tau, iso}$  is bounded. Noting that functions of finite variation are bounded, in view of Condition 4.5, we have that  $\mathcal{F}_{TV}$  is uniformly bounded by some constant that depends neither on  $\theta$  nor  $\tau$ . This implies that  $\mathcal{F}_{\tau, TV}$  is uniformly bounded. Finally, because  $\mathcal{F}_{\tau, TV}$ ,  $\mathcal{F}_{\tau, iso}$ ,  $\chi_m$  and the potential outcomes are uniformly bounded, the function class  $\mathcal{F}_{Lip, m}$  is also uniformly bounded.  $\square$

**Lemma C.3.** *Under conditions 4.5 and the conditions of Lemma C.2, the function  $\tau' \mapsto E[Y_1 - Y_0 \mid \theta_n^*(W) = \tau']$  has total variation bounded above by three times the total variation of  $\theta_0$ , where  $\theta_0$  is as in Condition 4.5.*

*Proof.* Since the function  $\theta_n^*$  is nondecreasing and piecewise constant, we have

$$E[Y_1 - Y_0 \mid (\theta_n^* \circ \tau)(W) = \tau'] = E[Y_1 - Y_0 \mid \tau(W) \in B_{\tau'}]$$

for the set  $B_{\tau'} := \{z \in \mathcal{T} : \theta_n^*(z) = \tau'\}$ , where  $B_{\tau'} = \{z \in \mathcal{T} : a(\tau') \leq z < b(\tau')\}$  for some endpoints  $a(\tau'), b(\tau') \in \mathbb{R}$ . The law of total expectation further implies that

$$E[Y_1 - Y_0 \mid \tau(W) \in B_{\tau'}] = E[\theta_0 \circ \tau(W) \mid \tau(W) \in B_{\tau'}],$$

where  $\theta_0$  is such that  $\theta_0 \circ \tau(W) = \gamma_0(\tau, W)$   $P$ -almost surely. By Condition 4.5, the function  $\theta_0$  is of bounded total variation. Heuristically, since  $\tau' \mapsto E[\theta_0 \circ \tau(W) \mid \tau(W) \in B_{\tau'}]$  is obtained by locally averaging  $\theta_0$  within the bins  $(B_{\tau'} : \tau')$ , its total variation should also be bounded. We show this formally as follows. Note first that

$$E[\theta_0 \circ \tau(W) \mid \tau(W) \in B_{\tau'}] = E[\theta_0^+ \circ \tau(W) \mid \tau(W) \in B_{\tau'}] - E[\theta_0^- \circ \tau(W) \mid \tau(W) \in B_{\tau'}],$$

where  $\theta_0^+$  and  $\theta_0^-$  are two bounded, nondecreasing functions satisfying the Jordan decomposition  $\theta_0 = \theta_0^+ - \theta_0^-$  (Theorem 4, Section 5.2 of Royden, 1963). Moreover, we can choose  $\theta_0^+$  such that  $\theta_0^+(\infty) - \theta_0^+(-\infty)$  is equal to the total variation of  $\theta_0$ . Since  $\|\theta_0^-\|_{TV} = \|\theta_0 - \theta_0^+\|_{TV} \leq \|\theta_0\|_{TV} + \|\theta_0^+\|_{TV}$ , we have that  $\|\theta_0^-\|_{TV}$  is bounded by  $2\|\theta_0\|_{TV}$ .

Since  $\theta_n^*$  is nondecreasing, by definition, we have that  $t_1 < t_2$  implies that  $x_1 < x_2$  for any  $x_1 \in B_{t_1}$  and  $x_2 \in B_{t_2}$ . It follows that both  $\tau' \mapsto E[\theta_0^+ \circ \tau(W) \mid \tau(W) \in B_{\tau'}]$  and  $\tau' \mapsto E[\theta_0^- \circ \tau(W) \mid \tau(W) \in B_{\tau'}]$  are nondecreasing; furthermore, they are also bounded. By Theorem 4 of Royden (1963), a function is of bounded variation if and only if it is the difference between two bounded nondecreasing functions. We conclude that  $\tau' \mapsto E[Y_1 - Y_0 \mid \theta_n^* \circ \tau(W) = \tau'] = E[\theta_0^+ \circ \tau(W) \mid \tau(W) \in B_{\tau'}] - E[\theta_0^- \circ \tau(W) \mid \tau(W) \in B_{\tau'}]$  is of bounded variation. Moreover, its total variation norm is bounded above by the sum of the total variation norm of  $E[\theta_0^+ \circ \tau(W) \mid \tau(W) \in B_{\tau'}]$  and that of  $E[\theta_0^- \circ \tau(W) \mid \tau(W) \in B_{\tau'}]$ . We recall that the total variation of monotone functions is simply the difference between the left and right endpoints of the monotone function, and that

$$\operatorname{ess\,inf}_{w \in \mathcal{W}} (\theta_0^+ \circ \tau)(w) \leq E[\theta_0^+ \circ \tau(W) \mid \tau(W) \in B_{\tau'}] \leq \operatorname{ess\,sup}_{w \in \mathcal{W}} (\theta_0^+ \circ \tau)(w),$$

and similarly for  $\theta_0^- \circ \tau$ . As a consequence, the total variation norms of  $E[\theta_0^+ \circ \tau(W) \mid \tau(W) \in B_{\tau'}]$  and  $E[\theta_0^- \circ \tau(W) \mid \tau(W) \in B_{\tau'}]$  are bounded by the total variation norm of  $\theta_0^+$  and that of  $\theta_0^-$ , respectively. Using the sublinearity of the total variation norm, we conclude that  $\tau' \mapsto E[Y_1 - Y_0 \mid \theta_n^* \circ \tau(W) = \tau']$  has total variation norm bounded above by  $3\|\theta_0\|_{TV}$ .  $\square$

### C.3. Proofs of theorems

#### PROOF OF THEOREM 4.6

*Proof.* Conditioning on  $\mathcal{D}_n$ , we have that

$$\begin{aligned} & E \{ [\gamma_0(\tau_n^*, W) - \tau_n^*(W)] [\chi_0(O) - \tau_n^*(W)] \mid \mathcal{D}_n \} \\ &= E \{ E \{ [\gamma_0(\tau_n^*, W) - \tau_n^*(W)] [\chi_0(O) - \tau_n^*(W)] \mid W \} \mid \mathcal{D}_n \} \\ &= E \{ [\gamma_0(\tau_n^*, W) - \tau_n^*(W)] [\tau_0(W) - \tau_n^*(W)] \mid \mathcal{D}_n \} \\ &= E \{ E \{ [\gamma_0(\tau_n^*, W) - \tau_n^*(W)] [\tau_0(W) - \tau_n^*(W)] \mid \tau_n^*(W) \} \mid \mathcal{D}_n \} \\ &= E \{ [\gamma_0(\tau_n^*, W) - \tau_n^*(W)] [\gamma_0(\tau_n^*, W) - \tau_n^*(W)] \mid \mathcal{D}_n \} \\ &= E \{ [\gamma_0(\tau_n^*, W) - \tau_n^*(W)]^2 \mid \mathcal{D}_n \}. \end{aligned}$$

The above equality implies that

$$\begin{aligned}
 \int \{\gamma_0(\tau_n^*, w) - \tau_n^*(w)\}^2 dP(w) &= \int \{\gamma_0(\tau_n^*, w) - \tau_n^*(w)\} \{\chi_0(o) - \tau_n^*(w)\} dP(o) \\
 &= \int \{\gamma_0(\tau_n^*, w) - \tau_n^*(w)\} \{\chi_0(o) - \chi_m(o)\} dP(o) \\
 &\quad + \int \{\gamma_0(\tau_n^*, w) - \tau_n^*(w)\} \{\chi_m(o) - \tau_n^*(w)\} dP(o).
 \end{aligned} \tag{6}$$

Note that, by Lemma C.1, for each real-valued function  $r$ ,  $\tau_n^*$  satisfies the equation

$$\frac{1}{\ell} \sum_{i \in \mathcal{I}_\ell} r(\tau_n^*(W_i)) [\chi_m(O_i) - \tau_n^*(W_i)] = 0.$$

Setting  $r(\tau') := E[Y_1 - Y_0 | \tau_n^*(W) = \tau'] - \tau'$ , we conclude that

$$\int \{\gamma_0(\tau_n^*, w) - \tau_n^*(w)\} \{\chi_m(o) - \tau_n^*(w)\} dP_\ell(o) = 0.$$

Subtracting the above score equation from the second summand in (6), we obtain that

$$\begin{aligned}
 \int \{\gamma_0(\tau_n^*, w) - \tau_n^*(w)\}^2 dP(w) &= \int \{\gamma_0(\tau_n^*, w) - \tau_n^*(w)\} \{\chi_0(o) - \chi_m(o)\} dP(o) \\
 &\quad + \int \{\gamma_0(\tau_n^*, w) - \tau_n^*(w)\} \{\chi_m(o) - \tau_n^*(w)\} d(P - P_\ell)(o).
 \end{aligned} \tag{7}$$

This may be written in shorthand as  $\|\gamma_0(\tau_n^*, \cdot) - \tau_n^*\|^2 = (I) + (II)$  with

$$\begin{aligned}
 (I) &:= P\{\gamma_0(\tau_n^*, \cdot) - \tau_n^*(\chi_0 - \chi_m)\} \\
 (II) &:= (P - P_\ell)\{\gamma_0(\tau_n^*, \cdot) - \tau_n^*(\chi_m - \tau_n^*)\}.
 \end{aligned}$$

In order to show the desired result, we will bound both (I) and (II).

We can bound (I) using the law of iterated conditional expectations and the Cauchy-Schwarz inequality. First, conditioning on  $\mathcal{E}_m$ , we note that

$$\begin{aligned}
 &P\{\gamma_0(\tau_n^*, \cdot) - \tau_n^*(\chi_0 - \chi_m)\} \\
 &= \int \{\gamma_0(\tau_n^*, w) - \tau_n^*(w)\} E[\chi_0(O) - \chi_m(O) | W = w, \mathcal{E}_m] dP(w) \\
 &\leq \|\gamma_0(\tau_n^*, \cdot) - \tau_n^*\| \|E[\chi_0(O) | W = \cdot] - E[\chi_m(O) | W = \cdot, \mathcal{E}_m]\|.
 \end{aligned} \tag{8}$$

Next, we express the second norm in (8) in terms of  $\|\pi_m - \pi_0\|$  and  $\|\mu_m - \mu_0\|$ . Recalling that  $E[\chi_0(O) | W = w] = \tau_0(w)$ , we have that

$$\begin{aligned}
 &E[\chi_m(O) | W = w, \mathcal{E}_m] - E[\chi_0(O) | W = w] \\
 &= \mu_m(1, w) - \mu_0(1, w) - [\mu_m(0, w) - \mu_0(0, w)] + \frac{\pi_0(w)}{\pi_m(w)} [\mu_0(1, w) - \mu_m(1, w)] \\
 &\quad + \frac{1 - \pi_0(w)}{1 - \pi_m(w)} [\mu_0(0, w) - \mu_m(0, w)] \\
 &= \left[ \frac{\pi_0(w) - \pi_m(w)}{\pi_m(w)} \right] [\mu_0(1, w) - \mu_m(1, w)] + \left[ \frac{\pi_m(w) - \pi_0(w)}{1 - \pi_m(w)} \right] [\mu_0(0, w) - \mu_m(0, w)].
 \end{aligned}$$

By Condition 4.2,  $P(1 - \eta > \pi_m(W) > \eta) = 1$  for some  $\eta > 0$ . The latter condition combined with the Cauchy-Schwarz inequality gives that  $\|E[\chi_0(O) | W = \cdot] - E[\chi_m(O) | W = \cdot, \mathcal{E}_m]\|$  is bounded above by

$$\|\pi_m(\cdot) - \pi_0(\cdot)\| [\mu_0(0, \cdot) - \mu_m(0, \cdot)] + \|\pi_m(\cdot) - \pi_0(\cdot)\| [\mu_0(1, \cdot) - \mu_m(1, \cdot)].$$

By Condition 4.2, we also have that for any  $P$ -measurable function  $h : \mathcal{W} \rightarrow \mathbb{R}$

$$\begin{aligned} \int h(w)^2 [\mu_0(1, w) - \mu_m(1, w)]^2 dP(w) &= \iint h(w)^2 [\mu_0(a, w) - \mu_m(a, w)]^2 \frac{a}{\pi_0(w)} P(da, dw) \\ &\leq \frac{1}{\eta} \iint h(w)^2 [\mu_0(a, w) - \mu_m(a, w)]^2 P(da, dw). \end{aligned}$$

The same bound holds for  $\int h(w)^2 [\mu_0(0, w) - \mu_m(0, w)]^2 dP(w)$ . Setting  $h : w \mapsto \pi_m(w) - \pi_0(w)$ , we conclude

$$\|E[\chi_m(O) | W = \cdot, \mathcal{E}_m] - E[\chi_0(O) | W = \cdot]\| \lesssim \|(\pi_m - \pi_0)(\mu_0 - \mu_m)\|. \quad (9)$$

Together, (8) and (9) yield that (I) is bounded above by

$$P\{[\gamma_0(\tau_n^*, \cdot) - \tau_n^*](\chi_0 - \chi_m)\} \lesssim \|\gamma_0(\tau_n^*, \cdot) - \tau_n^*\| \|(\pi_m - \pi_0)(\mu_0 - \mu_m)\|. \quad (10)$$

We now find an upper bound for (II). We claim that, conditionally on  $\mathcal{E}_m$ , the random functions appearing in this empirical process term are contained in fixed and uniformly bounded function classes. To see this, we note that  $\tau_n^* = \theta_n^* \circ \tau$  for some  $\theta_n^* \in \mathcal{F}_{iso}$  and, as a consequence,  $\tau_n^* \in \mathcal{F}_{\tau, iso}$ , a uniformly bounded function class by Lemma C.2,  $P_0$ -almost surely. By Lemma C.3, the function  $w \mapsto \gamma_0(\tau_n^*, w)$  falls in  $\mathcal{F}_{\tau, TV}$ . This further implies that  $o \mapsto \{E[Y_1 - Y_0 | \tau_n^*(W) = \tau_n^*(w)] - \tau_n^*(w)\} \{\chi_m(o) - \tau_n^*(w)\} \in \mathcal{F}_{Lip, m}$ , which is a uniformly bounded function class by Lemma C.2.

Next, we let  $C := \text{ess sup}_{x \in \mathcal{T}} |\theta_0(x)|$  and define  $K := B + C$ , where we recall that  $B := \sup_{m \in \mathbb{N}} \sup_{\mathcal{E}_m} \text{ess sup}_{o \in \mathcal{O}} \{|\chi_0(o)| + |\chi_m(o)|\}$ . Furthermore, we set  $\delta_n := \|\gamma_0(\tau_n^*, \cdot) - \tau_n^*\|$ , which is a random rate. For any given rate  $\delta$ , we define

$$S_n(\delta) := \sup_{\tau_1 \in \mathcal{F}_{\tau, TV}, \tau_2 \in \mathcal{F}_{\tau, iso}: \|\tau_1 - \tau_2\| \leq \delta} (P - P_\ell)\{(\tau_1 - \tau_2)(\chi_m - \tau_2)\} = \sup_{f \in \mathcal{F}_{Lip, m}: \|f\| \leq \delta K} (P - P_\ell)f.$$

As a consequence of the above, we have that (II)  $\leq S_n(\delta_n)$ . Due to the randomness in  $\delta_n$ , the above cannot be further upper-bounded immediately. To bound the term above, we will take a  $\delta > 0$  that is deterministic conditional on  $\mathcal{E}_m$ , and upper-bound  $\phi_n(\delta) := E\{S_n(\delta)\}$ , where the expectation is also taken over  $\mathcal{D}_n$ . To bound the above term, we will use empirical process techniques with the function classes  $\mathcal{F}_{iso}$ ,  $\mathcal{F}_{\tau, TV}$ ,  $\mathcal{F}_{\tau, iso}$  and  $\mathcal{F}_{Lip, m}$ . To do so, we must study the uniform entropy integral

$$\mathcal{J}(\delta, \mathcal{F}) := \int_0^\delta \sup_Q \sqrt{N(\varepsilon, \mathcal{F}, \|\cdot\|_Q)} d\varepsilon$$

for each of these function classes. By Lemma C.2, all these function classes are uniformly bounded. We note that, conditional on  $\mathcal{E}_m$  so that  $\chi_m$  is fixed,  $\mathcal{F}_{Lip, m}$  is a multivariate Lipschitz transformation of  $\mathcal{F}_{\tau, TV}$  and  $\mathcal{F}_{\tau, iso}$ , and therefore, by Theorem 2.10.20 of (van der Vaart & Wellner, 1996), we have that  $\mathcal{J}(\delta, \mathcal{F}_{Lip, m}) \lesssim \mathcal{J}(\delta, \mathcal{F}_{\tau, TV}) + \mathcal{J}(\delta, \mathcal{F}_{\tau, iso})$ . Since functions of bounded total variation can be written as a difference of nondecreasing monotone functions, we have by the same theorem that  $\mathcal{J}(\delta, \mathcal{F}_{TV}) \lesssim \mathcal{J}(\delta, \mathcal{F}_{iso})$ . We claim the same upper bound holds up to a constant for  $\mathcal{F}_{\tau, TV}$  and  $\mathcal{F}_{\tau, iso}$ . We establish this explicitly for  $\mathcal{F}_{\tau, iso}$  below; the result for  $\mathcal{F}_{\tau, TV}$  follows from an identical argument. We note that

$$\mathcal{J}(\delta, \mathcal{F}_{\tau, iso}) = \int_0^\delta \sup_Q \sqrt{N(\varepsilon, \mathcal{F}_{\tau, iso}, \|\cdot\|_Q)} d\varepsilon = \int_0^\delta \sup_Q \sqrt{N(\varepsilon, \mathcal{F}_{iso}, \|\cdot\|_{Q \circ \tau^{-1}})} d\varepsilon = \mathcal{J}(\delta, \mathcal{F}_{iso}),$$

where  $Q \circ \tau^{-1}$  is the push-forward probability measure for the random variable  $\tau(W)$ . We now proceed with bounding  $\phi_n(\delta)$ . Applying Theorem 2.10.20 of (van der Vaart & Wellner, 1996), we obtain, for any  $\delta > 0$  deterministic conditional on  $\mathcal{E}_m$ , that

$$\begin{aligned} E[S_n(\delta) | \mathcal{E}_m] &\lesssim \ell^{-1/2} \mathcal{J}(\delta, \mathcal{F}_{Lip, m}) \left(1 + \frac{\mathcal{J}(\delta, \mathcal{F}_{Lip, m})}{\sqrt{\ell} \delta^2}\right) \\ &\lesssim \ell^{-1/2} \mathcal{J}(\delta, \mathcal{F}_{iso}) \left(1 + \frac{\mathcal{J}(\delta, \mathcal{F}_{iso})}{\sqrt{\ell} \delta^2}\right), \end{aligned} \quad (11)$$

where the right-hand side can only be random through  $\delta$ .

We can now proceed with the main argument that gives a rate of convergence for  $\delta_n$ . First, we note that combining Equations 7 and 10 yields that the event

$$\left\{ \|\gamma_0(\tau_n^*, \cdot) - \tau_n^*\|^2 \leq \|\gamma_0(\tau_n^*, \cdot) - \tau_n^*\| \|(\pi_m - \pi_0)(\mu_m - \mu_0)\| + S_n(\delta_n) \right\}$$

occurs with probability one. We then proceed with a peeling argument to account for the randomness of  $\delta_n$ . Let  $\varepsilon_n$  be any given sequence that is deterministic conditional on  $\mathcal{E}_m$ , and define  $A_s$  as the event  $\{2^{s+1}\varepsilon_n \geq \|\gamma_0(\tau_n^*, \cdot) - \tau_n^*\| \geq 2^s\varepsilon_n\}$  as well as the random quantity  $\epsilon_m^{nuis} := \|(\pi_m - \pi_0)(\mu_m - \mu_0)\|$ . Then, for any  $S > 0$ , we have that

$$\begin{aligned} (\|\gamma_0(\tau_n^*, \cdot) - \tau_n^*\| \geq 2^S\varepsilon_n) &= \sum_{s=S}^{\infty} P(2^{s+1}\varepsilon_n \geq \|\gamma_0(\tau_n^*, \cdot) - \tau_n^*\| \geq 2^s\varepsilon_n) = \sum_{s=S}^{\infty} P(A_s) \\ &= \sum_{s=S}^{\infty} P\left(A_s, \delta_n^2 \leq \delta_n \epsilon_m^{nuis} + S_n(\delta_n)\right). \end{aligned} \quad (12)$$

In all the events in the above sum, we have that  $S_n(\delta_n) \leq S_n(2^{s+1}\varepsilon_n)$  since  $\delta_n = \|\gamma_0(\tau_n^*, \cdot) - \tau_n^*\|$ . Next, manipulating the inequalities in the above events, we have that

$$\begin{aligned} \{A_s, \delta_n^2 \leq \delta_n \epsilon_m^{nuis} + S_n(\delta_n)\} &\subseteq \{A_s, \delta_n^2 \leq 2^{s+1}\varepsilon_n \epsilon_m^{nuis} + S_n(2^{s+1}\varepsilon_n)\} \\ &\subseteq \{2^{2s}\varepsilon_n^2 \leq \delta_n^2 \leq 2^{s+1}\varepsilon_n \epsilon_m^{nuis} + S_n(2^{s+1}\varepsilon_n)\} \\ &\subseteq \{2^{2s}\varepsilon_n^2 \leq 2^{s+1}\varepsilon_n \epsilon_m^{nuis} + S_n(2^{s+1}\varepsilon_n)\}, \end{aligned}$$

which implies that the sum in (12) is upper bounded by

$$\sum_{s=S}^{\infty} P\left(2^{2s}\varepsilon_n^2 \leq 2^{s+1}\varepsilon_n \epsilon_m^{nuis} + S_n(2^{s+1}\varepsilon_n)\right).$$

Using (11) and Markov's inequality, we find that

$$\begin{aligned} &\sum_{s=S}^{\infty} P\left(2^{2s}\varepsilon_n^2 \leq 2^{s+1}\varepsilon_n \epsilon_m^{nuis} + S_n(2^{s+1}\varepsilon_n)\right) \\ &\leq \sum_{s=S}^{\infty} E\left\{P\left(2^{2s}\varepsilon_n^2 \leq 2^{s+1}\varepsilon_n \epsilon_m^{nuis} + S_n(2^{s+1}\varepsilon_n) \mid \mathcal{E}_m\right)\right\} \\ &\leq \sum_{s=S}^{\infty} E\left\{\frac{2^{s+1}\varepsilon_n \epsilon_m^{nuis} + E[S_n(2^{s+1}\varepsilon_n) \mid \mathcal{E}_m]}{2^{2s}\varepsilon_n^2}\right\} \\ &\lesssim \sum_{s=S}^{\infty} E\left[\frac{\epsilon_m^{nuis}}{2^{s-1}\varepsilon_n} + \frac{\mathcal{J}(2^{s+1}\varepsilon_n, \mathcal{F}_{iso})}{2^{2s}\sqrt{\ell}\varepsilon_n^2} \left(1 + \frac{\mathcal{J}(2^{s+1}\varepsilon_n, \mathcal{F}_{iso})}{\sqrt{\ell}2^{2s+1}\varepsilon_n^2}\right)\right]. \end{aligned}$$

As a consequence of Lemma C.2 and the covering number bound for bounded monotone functions given in Theorem 2.7.5 of van der Vaart & Wellner (1996), we have that  $\mathcal{J}(2^{s+1}\varepsilon_n, \mathcal{F}_{iso}) = 2^{s/2+1/2}\sqrt{\varepsilon_n}$ . Using this fact, we find that

$$\frac{\mathcal{J}(2^{s+1}\varepsilon_n, \mathcal{F}_{iso})}{2^{2s}\sqrt{\ell}\varepsilon_n^2} \lesssim \frac{1}{2^s} \frac{\mathcal{J}(\varepsilon_n, \mathcal{F}_{iso})}{\sqrt{\ell}\varepsilon_n^2},$$

from which it follows that

$$\frac{\mathcal{J}(2^{s+1}\varepsilon_n, \mathcal{F}_{iso}) \left(1 + \frac{\mathcal{J}(2^{s+1}\varepsilon_n, \mathcal{F}_{iso})}{\sqrt{\ell}2^{2s+1}\varepsilon_n^2}\right)}{2^{2s}\sqrt{\ell}\varepsilon_n^2} \lesssim 2^{-s} \frac{\mathcal{J}(\varepsilon_n, \mathcal{F}_{iso}) \left(1 + \frac{\mathcal{J}(\varepsilon_n, \mathcal{F}_{iso})}{\sqrt{\ell}\varepsilon_n^2}\right)}{\sqrt{\ell}\varepsilon_n^2}.$$

We now choose  $\varepsilon_n := \max\{\ell^{-1/3}, \|(\pi_m - \pi_0)(\mu_m - \mu_0)\|\}$ , which indeed is deterministic conditional on  $\mathcal{E}_m$ . This choice ensures that  $\mathcal{J}(\varepsilon_n, \mathcal{F}_{iso}) \lesssim \sqrt{\ell}\varepsilon_n^2$  and  $\epsilon_m^{nuis} = \|(\pi_m - \pi_0)(\mu_m - \mu_0)\| \lesssim \varepsilon_n$ , so that

$$\frac{\epsilon_m^{nuis}}{2^{s-1}\varepsilon_n} + \frac{\mathcal{J}(2^{s+1}\varepsilon_n, \mathcal{F}_{iso})}{2^{2s}\sqrt{\ell}\varepsilon_n^2} \left(1 + \frac{\mathcal{J}(2^{s+1}\varepsilon_n, \mathcal{F}_{iso})}{\sqrt{\ell}2^{2s+1}\varepsilon_n^2}\right) \lesssim \frac{1}{2^s},$$

where the right-hand side is nonrandom. Thus, we have that

$$P(\|\gamma_0(\tau_n^*, \cdot) - \tau_n^*\| \geq 2^S \varepsilon_n) \lesssim \sum_{s=S}^{\infty} \frac{1}{2^s} \xrightarrow{S \rightarrow \infty} 0.$$

As a consequence, for every  $\varepsilon > 0$ , we can find a constant  $2^S$  sufficiently large such that  $P(\|\gamma_0(\tau_n^*, \cdot) - \tau_n^*\| \geq 2^S \varepsilon_n) < \varepsilon$ . In other words, we have shown that  $\|\gamma_0(\tau_n^*, \cdot) - \tau_n^*\| = O_P(\varepsilon_n)$  for our choice of  $\varepsilon_n$ , and so,  $CAL(\tau_n^*) = \|\gamma_0(\tau_n^*, \cdot) - \tau_n^*\|^2 = O_P(\varepsilon_n^2)$ . The result follows from the fact that  $\varepsilon_n^2 \leq \ell^{-2/3} + \|(\pi_m - \pi_0)(\mu_m - \mu_0)\|^2$ .  $\square$

#### PROOF OF THEOREM 4.7

*Proof.* By the definition of the pointwise median stated in Section 2.1, for each covariate value  $w \in \mathcal{W}$ , there exists some random index  $j_n(w)$  such that  $\tau_n^*(w) = \tau_{n, j_n(w)}^*(w)$ . (We note here that this property may fail for other definitions of the median when  $k$  is even.) Thus, we have that  $|\gamma_0(\tau_n^*, w) - \tau_n^*(w)| = |\gamma_0(\tau_{n, j_n(w)}^*, w) - \tau_{n, j_n(w)}^*(w)| \leq \sum_{s=1}^k |\gamma_0(\tau_{n, s}^*, w) - \tau_{n, s}^*(w)|$ , and so,

$$\begin{aligned} \|\gamma_0(\tau_n^*, \cdot) - \tau_n^*\| &\leq \left\| \sum_{s=1}^k |\gamma_0(\tau_{n, s}^*, \cdot) - \tau_{n, s}^*| \right\| \leq \sum_{s=1}^k \|\gamma_0(\tau_{n, s}^*, \cdot) - \tau_{n, s}^*\| \\ &\leq \sqrt{k \sum_{s=1}^k \|\gamma_0(\tau_{n, s}^*, \cdot) - \tau_{n, s}^*\|^2}, \end{aligned}$$

where the final inequality follows from the Cauchy-Schwarz inequality. Squaring both sides gives that  $CAL(\tau_n^*) \leq k \sum_{s=1}^k CAL(\tau_{n, s}^*)$ , as desired.  $\square$

#### PROOF OF THEOREM 4.8

*Proof.* As before, we may write  $\tau_n^* = \theta_n^* \circ \tau$  for some  $\theta_n^* \in \mathcal{F}_{iso}$  that minimizes the empirical risk

$$R_n(\theta) : \theta \mapsto \sum_{i \in \mathcal{I}_\ell} [\chi_m(O_i) - \theta \circ \tau(W_i)]^2$$

over  $\mathcal{F}_{iso}$ . For any given  $\theta \in \mathcal{F}_{iso}$ , the one-sided path  $\{\varepsilon \mapsto \theta_n^* + \varepsilon(\theta - \theta_n^*) : \varepsilon \in [0, 1]\}$  through  $\theta_n^*$  lies entirely in  $\mathcal{F}_{iso}$  since  $\mathcal{F}_{iso}$  is a convex space. Furthermore, we have that

$$-2 \sum_{i \in \mathcal{I}_\ell} (\theta - \theta_n^*) \circ \tau(W_i) [\chi_m(O_i) - \theta_n^* \circ \tau(W_i)] = \lim_{\varepsilon \downarrow 0} \frac{R_n(\theta_n^* + \varepsilon(\theta - \theta_n^*)) - R_n(\theta_n^*)}{\varepsilon} \geq 0 \quad (13)$$

for all  $\theta \in \mathcal{F}_{iso}$ . The oracle isotonic risk minimizer  $\tau_0^*$  can be expressed as  $\tau_0^* = \theta_0 \circ \tau$  where  $\theta_0 := \operatorname{argmin}_{\theta \in \mathcal{F}_{iso}} \|\theta \circ \tau - \tau_0\|$ . Taking  $\theta = \theta_0$  in (13), we obtain the inequality

$$\sum_{i \in \mathcal{I}_\ell} [(\theta_0 - \theta_n^*) \circ \tau(W_i)] [\chi_m(O_i) - \theta_n^* \circ \tau(W_i)] \leq 0. \quad (14)$$

Rearranging terms and adding and subtracting  $P_\ell\{[(\theta_0 - \theta_n^*) \circ \tau](\chi_0)\}$  in the above inequality implies that  $P_\ell\{[(\theta_0 - \theta_n^*) \circ \tau](\chi_m - \chi_0)\} \leq P_\ell\{[(\theta_0 - \theta_n^*) \circ \tau](\theta_n^* \circ \tau - \chi_0)\}$ . Adding and subtracting  $P\{[(\theta_0 - \theta_n^*) \circ \tau](\theta_n^* \circ \tau - \chi_0)\}$  yields that

$$\begin{aligned} &P_\ell\{[(\theta_0 - \theta_n^*) \circ \tau](\chi_m - \chi_0)\} - (P_\ell - P)\{[(\theta_0 - \theta_n^*) \circ \tau](\theta_n^* \circ \tau - \chi_0)\} \\ &\leq P\{[(\theta_0 - \theta_n^*) \circ \tau](\theta_n^* \circ \tau - \chi_0)\}. \end{aligned} \quad (15)$$

Next, adding and subtracting  $P\{(\theta_0 \circ \tau)[(\theta_0 - \theta_n^*) \circ \tau]\}$ , we have that

$$\begin{aligned} &P\{[(\theta_0 - \theta_n^*) \circ \tau](\theta_n^* \circ \tau - \chi_0)\} \\ &= P\{[(\theta_0 - \theta_n^*) \circ \tau][\theta_n^* \circ \tau - E[\chi_0(O) | W = \cdot]]\} \\ &= P\{[(\theta_0 - \theta_n^*) \circ \tau](\theta_n^* \circ \tau - \tau_0)\} \\ &= P\{[(\theta_0 - \theta_n^*) \circ \tau][(\theta_n^* - \theta_0) \circ \tau]\} + P\{[(\theta_0 - \theta_n^*) \circ \tau](\theta_0 \circ \tau - \tau_0)\} \\ &= P\{[(\theta_0 - \theta_n^*) \circ \tau](\theta_0 \circ \tau - \tau_0)\} - \|(\theta_0 - \theta_n^*) \circ \tau\|^2, \end{aligned} \quad (16)$$

1045 where we used the fact that  $E[\chi_0(O) | W = w] = \tau_0(w)$ . Next, we note that  $\theta_0$  minimizes the population risk function  
 1046  $\theta \mapsto E_P[\tau_0(W) - \theta \circ \tau(W)]^2$  over  $\mathcal{F}_{iso}$ . As a consequence, the same argument used to derive (14) can be used to obtain  
 1047 that  $P\{[(\theta - \theta_0) \circ \tau](\tau_0 - \theta_0 \circ \tau)\} \leq 0$  for any  $\theta \in \mathcal{F}_{iso}$ . Taking  $\theta = \theta_n^*$ , we find that

$$1048 \quad P\{[(\theta_0 - \theta_n^*) \circ \tau](\theta_0 \circ \tau - \tau_0)\} \leq 0. \quad (17)$$

1050 Combining (16) and (17), we obtain that

$$1051 \quad P\{[(\theta_0 - \theta_n^*) \circ \tau](\theta_n^* \circ \tau - \chi_0)\} \leq -\|(\theta_0 - \theta_n^*) \circ \tau\|^2. \quad (18)$$

1053 Finally, combining (15) and (18), we obtain the following inequality

$$1054 \quad \|(\theta_0 - \theta_n^*) \circ \tau\|^2 \leq -P_\ell\{[(\theta_0 - \theta_n^*) \circ \tau](\chi_m - \chi_0)\} + (P_\ell - P)\{[(\theta_0 - \theta_n^*) \circ \tau](\theta_n^* \circ \tau - \chi_0)\}.$$

1055 Adding and subtracting  $P\{[(\theta_0 - \theta_n^*) \circ \tau](\chi_m - \chi_0)\}$  and noting that  $\tau_0^* - \tau_n^* = (\theta_0 - \theta_n^*) \circ \tau$ , we finally obtain the key  
 1056 inequality

$$1058 \quad \|\tau_0^* - \tau_n^*\|^2 \leq P[(\tau_0^* - \tau_n^*)(\chi_0 - \chi_m)] + (P - P_\ell)[(\tau_0^* - \tau_n^*)(\chi_m - \chi_0)] \\ 1059 \quad + (P_\ell - P)[(\tau_0^* - \tau_n^*)(\tau_n^* - \chi_0)]. \quad (19)$$

1061 The above is similar to (7) in the proof of Theorem 4.6, and a similar proof technique is used to establish a convergence rate  
 1062 for  $\tau_n^*$ . Specifically, we use the Cauchy-Schwarz inequality to bound the first term on the right-hand side of (19) in terms of  
 1063  $\|\tau_0^* - \tau_n^*\|$ , and empirical process techniques to bound the remaining terms in terms of a function of  $\|\tau_0^* - \tau_n^*\|$  with high  
 1064 probability. Using a similar approach as for the derivation of (10), we can upper-bound the first term of the right-hand side  
 1065 of (19) as  $P[(\tau_0^* - \tau_n^*)(\chi_0 - \chi_m)] \leq \|\tau_0^* - \tau_n^*\| \|(\pi_m - \pi_0)(\mu_m - \mu_0)\|$ . The second term in the right-hand side of (19) can  
 1066 be examined as follows. We let  $\mathcal{F}_{4,m} := \{(\tau_1 - \tau_2)(\chi_m - \chi_0); \tau_1, \tau_2 \in \mathcal{F}_{\tau,iso}\}$ , and define  $Q := \sup_{o \in \mathcal{O}} \chi_0(o)$ , which is  
 1067 finite in view of Conditions 4.1 and 4.2. Additionally, we let  $R := Q + B$ , and define for any fixed  $\delta \in \mathbb{R}$

$$1068 \quad Z_{1,n}(\delta) := \sup_{\theta_1, \theta_2 \in \mathcal{F}_{iso}: \|(\theta_1 - \theta_2) \circ \tau\| \leq \delta R} (P - P_\ell)\{[(\theta_1 - \theta_2) \circ \tau](\chi_m - \chi_0)\} = \sup_{f \in \mathcal{F}_{4,m}: \|f\| \leq \delta R} (P - P_\ell)f.$$

1070 Letting  $\delta_{1,n} := \|\tau_0^* - \tau_n^*\|$ , we have that  $(P - P_\ell)[(\tau_0^* - \tau_n^*)(\chi_m - \chi_0)] \leq Z_{1,n}(\delta_{1,n})$ . We note that  $\mathcal{F}_{4,m}$  is a Lipschitz  
 1071 transformation of the function classes  $\mathcal{F}_{\tau,iso}$  and  $\mathcal{F}_{\tau,iso}$ , and so, for every  $\delta > 0$  that is deterministic conditional on  $\mathcal{E}_m$ , we  
 1072 have that

$$1074 \quad \psi_{1,n}(\delta | \mathcal{E}_m) := E[Z_{1,n}(\delta) | \mathcal{E}_m] \lesssim \ell^{-1/2} \mathcal{J}(\delta, \mathcal{F}_{iso}) \left(1 + \frac{\mathcal{J}(\delta, \mathcal{F}_{iso})}{\sqrt{\ell} \delta^2}\right)$$

1076 in view of Theorem 2.10.20 of (van der Vaart & Wellner, 1996) and the results outlined in Theorem 4.6, where the  
 1077 right-hand side can only be random through  $\delta$ . Finally, the third term in (19) can be studied as follows. We let  $\mathcal{F}_5 :=$   
 1078  $\{(\tau_1 - \tau_2)(\tau_2 - \chi_0) : \tau_1, \tau_2 \in \mathcal{F}_{\tau,iso}\}$ , and for any given  $\delta > 0$ , we define

$$1079 \quad Z_{2,n}(\delta) := \sup_{\theta_1, \theta_2 \in \mathcal{F}_{iso}: \|(\theta_1 - \theta_2) \circ \tau\| \leq \delta G} (P - P_\ell)\{[(\theta_1 - \theta_2) \circ \tau](\theta_2 - \chi_0)\} = \sup_{f \in \mathcal{F}_5: \|f\| \leq \delta G} (P - P_\ell)f$$

1081 with  $G := Q + B$ . We note that  $\mathcal{F}_5$  is a Lipschitz transformation of  $\mathcal{F}_{\tau,iso}$ . Hence, similarly as above, for any  $\delta > 0$  that is  
 1082 nonrandom conditional on  $\mathcal{E}_m$ , we have that

$$1084 \quad \psi_{2,n}(\delta | \mathcal{E}_m) := E[Z_{2,n}(\delta) | \mathcal{E}_m] \lesssim \ell^{-1/2} \mathcal{J}(\delta, \mathcal{F}_{iso}) \left(1 + \frac{\mathcal{J}(\delta, \mathcal{F}_{iso})}{\sqrt{\ell} \delta^2}\right),$$

1086 where the right-hand side can only be random through  $\delta$ . Defining  $\epsilon_m^{nuis} := \|(\pi_m - \pi_0)(\mu_m - \mu_0)\|$ , by a similar peeling  
 1087 argument as in Theorem 4.6, for any rate  $\epsilon_n$  that is nonrandom conditional on  $\mathcal{E}_m$ , we can show that

$$1089 \quad P(\|\tau_0^* - \tau_n^*\| \geq 2^S \epsilon_n) \leq \sum_{s=S}^{\infty} E \left[ \frac{2^{s+1} \epsilon_n \epsilon_m^{nuis} + \psi_{1,n}(2^{s+1} \epsilon_n | \mathcal{E}_m) + \psi_{2,n}(2^{s+1} \epsilon_n | \mathcal{E}_m)}{2^{2s} \epsilon_n^2} \right] \\ 1092 \quad \lesssim \sum_{s=S}^{\infty} E \left[ \frac{\epsilon_m^{nuis}}{2^{s-1} \epsilon_n} + \frac{\mathcal{J}(2^{s+1} \epsilon_n, \mathcal{F}_{iso})}{2^{2s} \sqrt{\ell} \epsilon_n^2} \left(1 + \frac{\mathcal{J}(2^{s+1} \epsilon_n, \mathcal{F}_{iso})}{\sqrt{\ell} 2^{2s+1} \epsilon_n^2}\right) \right].$$

1094 Then, by the same arguments used in Theorem 4.6 and the same choice of  $\mathcal{E}_m$ -random  $\epsilon_n$ , we can estab-  
 1095 lish that  $\|\tau_0^* - \tau_n^*\| = O_P(\ell^{-1/3}) + O_P(\|(\pi_m - \pi_0)(\mu_m - \mu_0)\|)$ . By the triangle inequality and the fact that  
 1096  $\tau_0^* = \operatorname{argmin}_{\theta \circ \tau: \theta \in \mathcal{F}_{iso}} \|\tau_0 - \theta \circ \tau\|$  implies  $\|\tau_0 - \tau_0^*\| \leq \|\tau_0 - \tau\|$ , we find that  $\|\tau_0 - \tau_n^*\| \leq \|\tau_0 - \tau_0^*\| +$   
 1097  $\|\tau_0^* - \tau_n^*\| \leq \|\tau_0 - \tau\| + \|\tau_0^* - \tau_n^*\|$ . Combining these bounds, we find that  $\|\tau_0 - \tau_n^*\| \leq \|\tau_0 - \tau\| + O_P(\ell^{-1/3}) +$   
 1098  $O_P(\|(\pi_m - \pi_0)(\mu_m - \mu_0)\|)$ .  $\square$

1099



## C.4. Statement and proof of generalized Theorem 4.6 for random predictor

Here, we consider the same setup as Theorem 4.6 but allow  $\tau_n^*$  to be obtained from a random predictor  $\tau_m$ , as long as  $\tau_m$  is built using only data in  $\mathcal{E}_m$ .

Condition C.4 (independence of predictor). The predictor  $w \mapsto \tau_m(w)$  is independent of  $\mathcal{C}_\ell$ .

**Theorem C.5** (Calibration with random predictors). *Provided Conditions 4.1–C.4 hold, it holds that*

$$\text{CAL}(\tau_n^*) = O_P \left( \ell^{-2/3} + \|(\pi_m - \pi_0)(\mu_m - \mu_0)\|^2 \right).$$

*Proof.* Arguing exactly as in Theorem 4.6 with  $\tau$  taken to be  $\tau_m$  and conditioning on  $\mathcal{E}_m$  as needed, we obtain the basic inequality stating that

$$\|\gamma_0(\tau_n^*, \cdot) - \tau_n^*\|^2 \leq P\{\gamma_0(\tau_n^*, \cdot) - \tau_n^*(\chi_0 - \chi_m)\} + (P - P_\ell)\{\gamma_0(\tau_n^*, \cdot) - \tau_n^*(\chi_m - \tau_n^*)\}$$

$P$ -almost surely, where  $\tau_n^* := \theta_n^* \circ \tau_m$ . To establish the result of the theorem, we only need to make minor modifications to the proof of Theorem 4.6 to allow  $\tau$  to be replaced by  $\tau_m$ . We sketch those modifications here. A core component of the proof of Theorem 4.6 involved upper-bounding  $E[S_n(\delta) | \mathcal{E}_m]$ ; this must now be done with  $S_n(\delta)$  defined as

$$\sup_{\tau_1 \in \mathcal{F}_{\tau_m, TV}, \tau_2 \in \mathcal{F}_{\tau_m, iso}: \|\tau_1 - \tau_2\| \leq \delta} (P - P_\ell)[(\tau_1 - \tau_2)(\chi_m - \tau_2)] = \sup_{f \in \mathcal{F}_{Lip, m}: \|f\| \leq \delta K} (P - P_\ell)f$$

with  $\tau_m$  now a random predictor. Previously, we showed that  $E[S_n(\delta) | \mathcal{E}_m]$  can be bounded by a nonrandom constant depending on  $n, m$  and  $\delta$  that is independent of  $\mathcal{E}_m$ . To do so, we showed that the random function class  $\mathcal{F}_{Lip, m}$  is fixed conditional on  $\mathcal{E}_m$ , uniformly bounded, and has uniform entropy integral bounded by the uniform entropy integral of  $\mathcal{F}_{iso}$ . It suffices to show that this remains true when  $\tau$  is replaced by  $\tau_m$ . Since  $\tau_m$  is obtained from  $\mathcal{E}_m$ , as with  $\chi_m$ , the predictor  $\tau_m$  is deterministic conditionally on  $\mathcal{E}_m$ . As a consequence, the function classes  $\mathcal{F}_{\tau_m, TV}$  and  $\mathcal{F}_{\tau_m, iso}$ , which are now random through  $\tau_m$ , are fixed conditional on  $\mathcal{E}_m$ . Since  $\mathcal{F}_{Lip, m}$  is obtained from a Lipschitz transformation of elements of  $\mathcal{F}_{\tau_m, TV}$  and  $\mathcal{F}_{\tau_m, iso}$ , we have that  $\mathcal{F}_{Lip, m}$  is also fixed conditional on  $\mathcal{E}_m$ . Moreover, by the same argument as in the proof of Lemma C.2, which also holds for random  $\tau$ , these function classes are uniformly bounded by a nonrandom constant almost surely. Finally, the preservation of the uniform entropy integral argument of the proof of Theorem 4.6 is valid with  $\tau$  random. With these modifications to the proof of Theorem 4.6, the result follows.  $\square$

## D. Simulation studies

### D.1. Data-generating mechanisms

In simulation studies, data units were generated as follows for the two scenarios considered.

Scenario 1:

1. generate  $W_1, W_2, \dots, W_4$  independently from the uniform distribution on  $(-1, +1)$ ;
2. given  $(W_1, W_2, W_3, W_4) = (w_1, w_2, w_3, w_4)$ , generate  $A$  as a Bernoulli random variable with success probability  $\pi_0(w_1, w_2, w_3, w_4) := \text{expit}\{-0.25 - w_1 + 0.5w_2 - w_3 + 0.5w_4\}$ ;
3. given  $(W_1, W_2, W_3, W_4) = (w_1, w_2, w_3, w_4)$  and  $A = a$ , generate  $Y$  as a Bernoulli random variable with success probability  $\mu_0(a, w_1, w_2, \dots, w_4) := \text{expit}\{1.5 + 1.5a + 2a|w_1||w_2| - 2.5(1-a)|w_2|w_3 + 2.5w_3 + 2.5(1-a)\sqrt{|w_4|} - 1.5aI(w_2 < 0.5) + 1.5(1-a)I(w_4 < 0)\}$ .

Scenario 2:

- generate  $W_1, W_2, \dots, W_{20}$  independently from the uniform distribution on  $(-1, +1)$ ;
- given  $(W_1, W_2, \dots, W_{20}) = (w_1, w_2, \dots, w_{20})$ , generate  $A$  as a Bernoulli random variable with success probability  $\pi_0(w_1, w_2, \dots, w_{20}) := \text{expit}\{0.2 - 0.5w_1 - 0.5w_2 - 0.5w_3 + 0.5w_4 - 0.5w_5 + 0.5w_6 - 0.5w_7 - 0.5w_8 - 0.5w_9 - 0.2w_{10} + 0.5w_{11} - w_{12} + w_{13} - 1.5w_{14} + w_{15} - w_{16} + 2w_{17} - w_{18} + 1.5w_{19} - w_{20}\}$ ;

- given  $(W_1, W_2, \dots, W_{20}) = (w_1, w_2, \dots, w_{20})$  and  $A = a$ , generate  $Y$  as a normal random variable with mean  $\mu_0(a, w_1, w_2, \dots, w_{20}) = -0.5 + 3.5a + 3aw_1 + 6.5(1-a)w_2 + 1.5aw_3 + 4(1-a)w_4 + 2.5aw_5 - 6(1-a)w_6 + 1aw_7 + 4.5(1-a)w_8 + aw_9 + 2.5(1-a)w_{10} + 1.5w_{11} - 2.5w_{12} + w_{13} - 1.5w_{14} + 3w_{15} - 2w_{16} + 3w_{17} - w_{18} + 1.5w_{19} - 2w_{20}$  and unit variance.

Coefficients of the propensity score logistic regression models above were selected such that the probabilities of treatment were bounded between 0.05 and 0.95 in the low-dimensional case (Scenario 1), and between 0.01 and 0.99 in the high-dimensional setting (Scenario 2).

## D.2. Implementation of the causal isotonic calibrator

In our simulation studies, we followed Algorithm 3 to fit the causal isotonic calibrator. In particular, we estimated the components of  $\chi_0$  (i.e.,  $\mu_0$  and  $\pi_0$ ) using the Super Learner (van der Laan et al., 2007) in Scenario 1, and penalized regression in Scenario 2. Super learner is an ensemble learning approach that uses cross-validation to select a convex combination of a library of candidate prediction methods. Table 1 shows the library of prediction models we used to estimate  $\mu_0$  and  $\pi_0$ . Note that all of our models for the outcome regression were misspecified in Scenario 1 because of the nonlinearities in the true outcome regression. However, in both scenarios, the propensity score estimator was a consistent estimator of the true propensity score. Additionally, for numerical stability, we imposed a threshold on the estimated propensity scores such that it took values between 0.01 and 0.99. We used the R package `sl3` (Coyle et al., 2021) to implement the estimation procedure. Finally, we used the R function `isoreg` to performed the isotonic regression step.

Table 1. Information on the set of estimators used by the Super Learner to estimate the pseudo-outcome components. Abbreviations: generalized additive models (GAM), generalized linear model (GLM), generalized linear model with lasso regularization (GLMnet), gradient boosted trees (GBRT), random forests (RF), multivariate adaptive regression splines (MARS).

| scenario | library for $\mu_0$                                                                  | library for $\pi_0$                                                 |
|----------|--------------------------------------------------------------------------------------|---------------------------------------------------------------------|
| 1        | logistic regression, GLMnet, GAM, GBRT with depth $\in \{2, 3, 5, 6, 8\}$ , RF, MARS | logistic regression, GLMnet, GAM, GBRT with depth $\in \{2, 4, 6\}$ |
| 2        | GLMnet                                                                               | GLMnet                                                              |

## D.3. Performance metrics

We estimated the performance metrics as follows. With a slight abuse of notation, let  $\hat{\tau}$  denote an arbitrary estimated treatment effect predictor or its calibrated version. For each fitted  $\hat{\tau}$  in a given simulation, we computed its mean squared error by taking the empirical mean of the squared difference between the fitted values of the CATE estimator and  $\tau_0$ ,

$$\widehat{\text{MSE}}(\hat{\tau}) := \frac{1}{n_{\mathcal{V}}} \sum_{i:w_i \in \mathcal{V}} [\hat{\tau}(w_i) - \tau_0(w_i)]^2.$$

We obtained the estimated calibration measure in two steps. We recall that the calibration measure for a given predictor  $\tau$  is

$$\int [\gamma_0(\tau, w) - \tau(w)]^2 dP_W(w).$$

First, we estimated  $\gamma_0(\hat{\tau}, w)$  using an independent dataset of 100,000 observations and fitted gradient boosted regression trees with the fitted values of the treatment effect predictors as covariates and the true CATE as outcome. For each simulation setting and CATE estimator, the depths of each of the regression trees were obtained using cross-validation in a separate simulation. Let  $\hat{\gamma}_0(\hat{\tau}, w)$  denote the estimated function. In the second step, we used the sample  $\mathcal{V}$  to estimate the calibration measure as

$$\widehat{\text{CAL}}(\tau) := \frac{1}{n_{\mathcal{V}}} \sum_{i:w_i \in \mathcal{V}} [\tau_0(w_i) - \hat{\tau}(w_i)] [\hat{\gamma}_0(\hat{\tau}, w_i) - \hat{\tau}(w_i)].$$

The above measure has the advantage of having less bias with respect to  $\text{CAL}(\hat{\tau})$  than the plug-in estimator  $n_{\mathcal{V}}^{-1} \sum_{i:w_i \in \mathcal{V}} [\hat{\gamma}_0(\hat{\tau}, w_i) - \hat{\tau}(w_i)]^2$ .

E. Simulation results

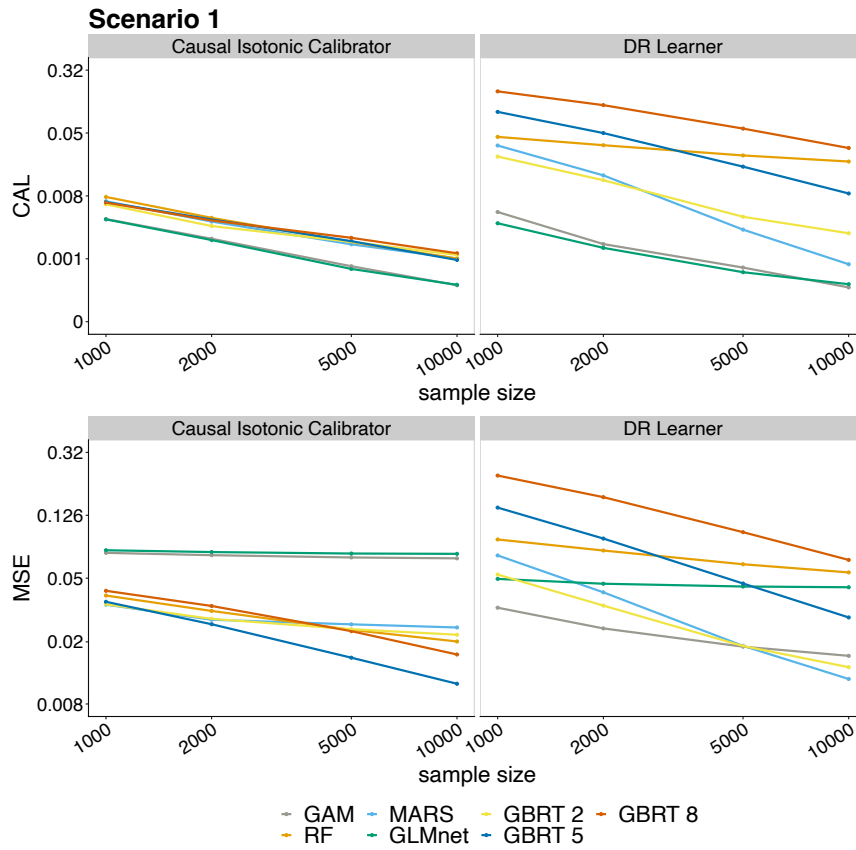

Figure 3. Calibration error and MSE in Scenario 1. The panels show the calibration error (top) and MSE (bottom) using the calibrated (left) and uncalibrated Double Robust Learner (right) predictors as a function of sample size. The y-axes are on a log scale.

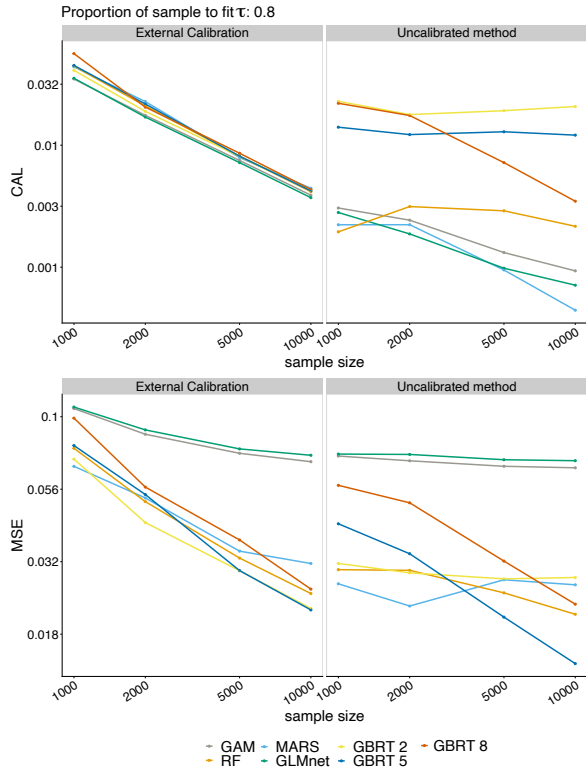

(a) Scenario 1 calibration measure and MSE simulation results for causal calibration approach with an external hold-out dataset. The top left and right panels show the calibration measure and using conventional calibration and the uncalibrated estimator, respectively. Similarly, the bottom plots show MSE for the calibrated and uncalibrated estimators. Results for GLM and GBRT with depths of 3 and 6 are omitted because they were nearly identical to results shown for GLMnet and GBRT with other depths, respectively.

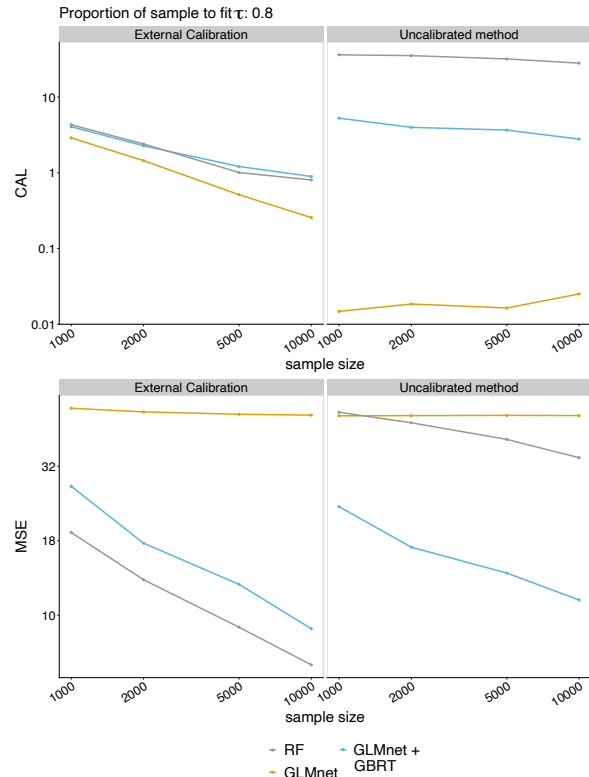

(b) Scenario 2 calibration measure and MSE simulation results for causal calibration approach with hold-out dataset. The top left and right panels show the calibration error using conventional calibration and the uncalibrated estimator, respectively. Similarly, the bottom plots show the MSE for the calibrated and uncalibrated estimators.

Figure 4. Causal isotonic calibration with a hold-out dataset external to the training dataset: Monte-Carlo estimates of calibration measure and MSE for calibrated vs uncalibrated predictors for Scenarios 1 and 2.

Table 2. Scenario 1 bias within bins of predictions for the calibrated and uncalibrated estimators. Each row shows the resulting bias for a given CATE estimator, and the Cal column indicates if it is calibrated or not. The columns are organized by sample size, and within each sample size, we show the results for the bias in the upper and lower deciles. Abbreviations: calibrated (cal), estimator (est), generalized additive models (GAM), generalized linear model (GLM), generalized linear model with lasso regularization (GLMnet), gradient boosted regression trees (GBRT), random forests (RF), multivariate adaptive regression splines (MARS).

| Sample Size |                | 1000         |              | 2000         |              | 5000         |              | 10000        |              |
|-------------|----------------|--------------|--------------|--------------|--------------|--------------|--------------|--------------|--------------|
| Cal         | CATE estimator | Lower Decile | Upper Decile |
| yes         | MARS           | -0.01        | -0.02        | 0            | -0.01        | 0            | -0.01        | -0.02        | 0.02         |
| no          | MARS           | -0.02        | -0.03        | -0.01        | -0.02        | -0.02        | -0.01        | -0.05        | 0.03         |
| yes         | GAM            | -0.02        | 0.01         | 0            | 0.01         | 0            | 0.03         | -0.01        | 0.05         |
| no          | GAM            | 0.02         | -0.06        | 0.03         | -0.07        | 0.02         | -0.05        | 0.02         | -0.04        |
| yes         | GLM            | -0.01        | 0.02         | -0.01        | 0.02         | 0            | 0.05         | -0.01        | 0.06         |
| no          | GLM            | 0.02         | -0.01        | 0.02         | -0.02        | 0.02         | -0.01        | 0.02         | -0.01        |
| yes         | GLMnet         | -0.01        | 0.02         | -0.01        | 0.02         | 0            | 0.05         | -0.01        | 0.06         |
| no          | GLMnet         | 0.02         | -0.02        | 0.02         | -0.02        | 0.03         | -0.01        | 0.03         | -0.01        |
| yes         | RF             | -0.01        | 0            | 0            | 0            | -0.03        | 0.03         | -0.04        | 0.04         |
| no          | RF             | -0.09        | 0.04         | -0.08        | 0.05         | -0.08        | 0.04         | -0.06        | 0.03         |
| yes         | GBRT 2         | -0.01        | 0            | 0            | -0.01        | -0.01        | 0.01         | 0            | 0.02         |
| no          | GBRT 2         | 0.1          | -0.16        | 0.11         | -0.16        | 0.12         | -0.15        | 0.13         | -0.14        |
| yes         | GBRT 3         | -0.02        | -0.02        | 0            | -0.02        | -0.01        | 0            | -0.02        | 0.01         |
| no          | GBRT 3         | 0.02         | -0.14        | 0.02         | -0.14        | 0.03         | -0.1         | 0.02         | -0.08        |
| yes         | GBRT 5         | -0.01        | -0.02        | 0            | -0.01        | 0            | 0            | -0.01        | 0            |
| no          | GBRT 5         | -0.04        | -0.04        | -0.01        | -0.06        | -0.07        | 0.01         | -0.11        | 0.05         |
| yes         | GBRT 6         | 0            | -0.03        | 0.01         | -0.02        | 0            | -0.01        | -0.01        | 0            |
| no          | GBRT 6         | -0.07        | 0            | -0.04        | -0.03        | -0.11        | 0.06         | -0.16        | 0.1          |
| yes         | GBRT 8         | 0.01         | -0.04        | 0.02         | -0.03        | 0            | -0.01        | -0.01        | -0.01        |
| no          | GBRT 8         | -0.14        | 0.08         | -0.1         | 0.04         | -0.19        | 0.14         | -0.22        | 0.17         |

Table 3. Scenario 2 bias within bins of predictions for the calibrated and uncalibrated estimators. Each row shows the resulting bias for a given CATE estimator, and the Cal column indicates if it is calibrated or not. The columns are organized by sample size, and within each sample size, we show the results for the bias in the upper and lower deciles. Abbreviations: calibrated (cal), generalized linear model with lasso regularization (GLMnet), gradient boosted regression trees with GLMNet screening (GLMNet scr + GBRT).

| Sample Size |                   | 1000         |              | 2000         |              | 5000         |              | 10000        |              |
|-------------|-------------------|--------------|--------------|--------------|--------------|--------------|--------------|--------------|--------------|
| Cal         | CATE estimator    | Lower Decile | Upper Decile |
| yes         | GLMnet            | 0            | 0            | 0            | 0            | 0.01         | 0.01         | 0.01         | 0.01         |
| no          | GLMnet            | 0.18         | 0.19         | 0.2          | 0.18         | 0.15         | 0.16         | 0.14         | 0.12         |
| yes         | GLMnet scr + GBRT | -0.23        | -0.06        | -0.18        | -0.06        | -0.33        | -0.08        | -0.37        | -0.1         |
| no          | GLMnet scr + GBRT | -0.36        | -0.16        | -0.34        | -0.15        | -0.4         | -0.2         | -0.35        | -0.22        |
| yes         | random forest     | -0.09        | -0.03        | -0.06        | -0.03        | -0.14        | -0.04        | -0.21        | -0.04        |
| no          | random forest     | -0.9         | -0.75        | -0.86        | -0.7         | -0.95        | -0.82        | -0.98        | -0.87        |
